# Supplementary material for: Fabrication and Characterization of Electrospun PHA/Graphene Silver Nano-Composite Scaffold for Antibacterial Application
Source: Preprints.org preprint supplement (doi:10.20944/preprints201808.0253.v1), 2018-08-14
Supplement: Supplementary file 1 [file supplementary]

**Supporting Information**

**Title:** “**Fabrication and Characterization of Electrospun PHA/Graphene Silver Nano-Composite Scaffold for Antibacterial Applications - Supplementary material”**

**Authors:** Abdul Mukheem, Kasturi Muthoosamy, Sivakumar Manickam, Kumar Sudesh, Syed Shahabuddin, Saidur Rahman, N. Akbar, Nanthini Sridewi


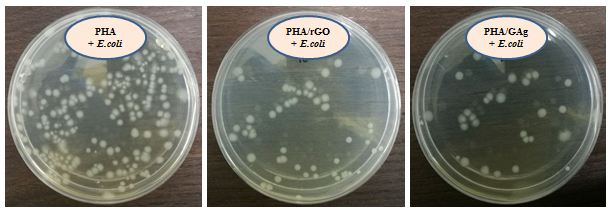


**Figure S1** At the time intravel of 4 h bactericidal activity of PHA, PHA/rGO and PHA/GAg against E.coli was evaluated. Significant decrease is observed in the CFU which demonstrates the bactericidal activity of PHA/rGO and PHA/GAg compare to PHA alone. PHA/GAg is consider very effective with its dual mode of action (reduced graphene and silver nanoparticles) towards the E.coli and is highly significant. Positive control data has not presented here


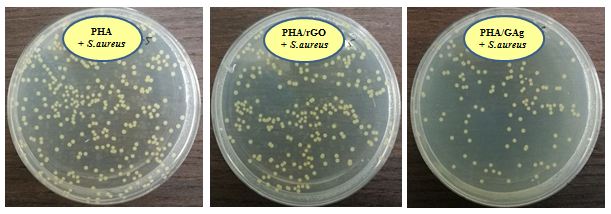


**Figure S2** The antibacterial activity after 4 h time intraval, was evaluated for PHA, PHA/rGO and PHA/GAg against S.aureus. Significant decrease is observed in the CFU which demonstrates the bactericidal activity of PHA/rGO and PHA/GAg compare to PHA alone. PHA/rGO and PHA/GAg has shown less reduction compare to E.coli. Positive control data has not presented here
